# Supplementary material for: The Effects of 12-Week Beta-Hydroxy-Beta-Methylbutyrate Supplementation in Patients with Liver Cirrhosis: Results from a Randomized Controlled Single-Blind Pilot Study
Source: MDPI journal article supplement (doi:10.3390/nu13072296), 2021-07-02
Supplement: s1 [file s1]

# Supplementary Materials

**Table S1.** Modifications of liver tests during the study.

|                                    | T0           | T1         | <i>P value</i> |
|------------------------------------|--------------|------------|----------------|
| <u>HMB GROUP (14 patients)</u>     |              |            |                |
| AST (U/L)                          | 40.55 ± 26   | 34.11 ± 23 | N.S.           |
| ALT (U/L)                          | 33.6 ± 20    | 30.11 ± 21 | N.S.           |
| Gamma GT (U/L)                     | 238.37 ± 311 | 200 ± 286  | N.S.           |
| Total Bilirubin (mg/dl)            | 1.4 ± 0.3    | 1.8 ± 0.17 | N.S.           |
| Direct Bilirubin (mg/dl)           | 0.5 ± 0.3    | 0.4 ± 0.2  | N.S.           |
| MELD                               | 9 ± 2.7      | 8.5 ± 2.4  | 9.2 ± 4.6      |
| CHILD-PUG SCORE                    | 5.6 ± 0.8    | 5.6 ± 0.6  | 5.5 ± 0.7      |
|                                    | T0           | T1         | <i>P value</i> |
| <u>PLACEBO GROUP (10 patients)</u> |              |            |                |
| AST (U/L)                          | 40 ± 24      | 38 ± 16    | N.S.           |
| ALT (U/L)                          | 36.7 ± 11    | 40 ± 10    | N.S.           |
| Gamma GT (U/L)                     | 148 ± 179    | 105 ± 88   | N.S.           |
| Total Bilirubin (mg/dl)            | 1.13 ± 0.6   | 1.4 ± 0.8  | N.S.           |
| Direct Bilirubin (mg/dl)           | 0.4 ± 0.2    | 0.5 ± 0.3  | N.S.           |
| MELD                               | 9.8 ± 3.2    | 9.9 ± 2.6  | 9,9 ± 2,5      |
| CHILD-PUG SCORE                    | 5.6 ± 0.9    | 5.6 ± 0.7  | 5.6 ± 0.7      |

Value expressed as mean ± SD. Abbreviations: AST (aspartate aminotransferase), ALT (Alanine Aminotransferase), Gamma GT (Gamma Glutamyl Transferase).

**Table S2.** Modifications of cognitive test during the study.

|                                    | T0       | T1         | T2       |
|------------------------------------|----------|------------|----------|
| <u>HMB GROUP (14 patients)</u>     |          |            |          |
| PHES                               | -2 ± 1.5 | -2.3 ± 2.3 | -2 ± 1.6 |
| ANT                                | 17 ± 6   | 19 ± 4     | 20 ± 4   |
|                                    | T0       | T1         | T2       |
| <u>PLACEBO GROUP (10 patients)</u> |          |            |          |
| PHES                               | -1 ± 3   | -0.4 ± 2.1 | 0 ± 0.8  |
| ANT                                | 21 ± 6   | 21 ± 4     | 19 ± 5   |

Value expressed as mean ± SD. Abbreviations: PHES (Psychometric Hepatic Encephalopathy Score), ANT (Animal Naming Test).
